# Supplementary material for: Cross Species Genomic Analysis Identifies a Mouse Model as Undifferentiated Pleomorphic Sarcoma/Malignant Fibrous Histiocytoma
Source: PubMed Central journal article supplement (PMC2779485; doi:10.1371/journal.pone.0008075), 2009-11-30

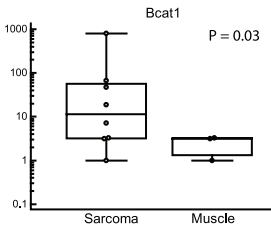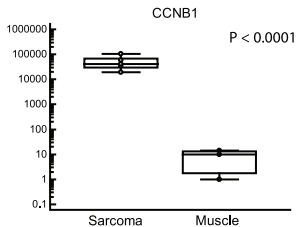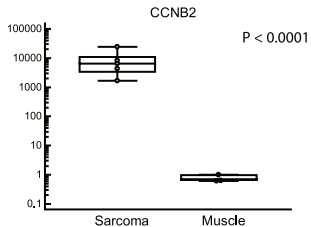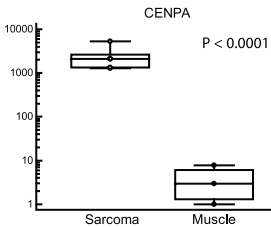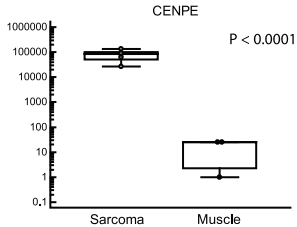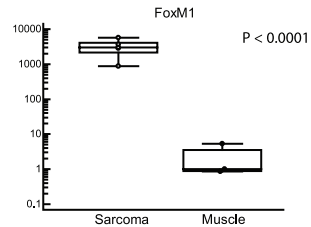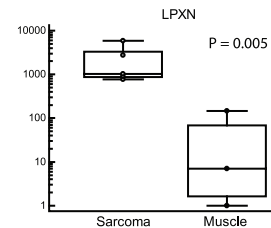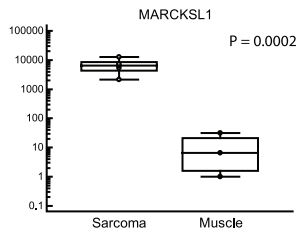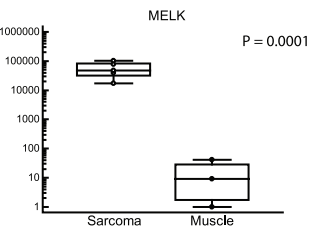

Supplement: pone.0008075.s009.pdf [file pone.0008075.s009.pdf]
